# Supplementary material for: Evidence of elevated heavy metals concentrations in wild and farmed sugar kelp (Saccharina latissima) in New England
Source: PubMed Central journal article supplement (PMC10582040; doi:10.1038/s41598-023-44685-4), 2023-10-17
Supplement: 41598_2023_44685_MOESM1_ESM.pdf [file 41598_2023_44685_MOESM1_ESM.pdf]

Supplemental figures and tables for:

**Evidence of elevated heavy metals concentrations in wild and farmed sugar kelp (*Saccharina latissima*) in New England**

**Authorship list:**

Brianna K. Shaughnessy<sup>1\*</sup>, Brian P. Jackson<sup>2</sup>, Jarrett E.K. Byrnes<sup>1,3</sup>

\* To whom correspondence should be addressed.

1 - School for the Environment. University of Massachusetts Boston. 100 Morrissey Blvd.

Boston, MA 02125 USA. Electronic address: [brianna.shaughnessy@umb.edu](mailto:brianna.shaughnessy@umb.edu).

2 - Department of Earth Sciences, Dartmouth College, 19 Fayerweather Hill Road, Hanover, NH

03755 USA. Electronic address: [bpj@dartmouth.edu](mailto:bpj@dartmouth.edu).

3 - Department of Biology. University of Massachusetts Boston. 100 Morrissey Blvd. Boston,

MA 02125 USA. Electronic address: [jarrett.byrnes@umb.edu](mailto:jarrett.byrnes@umb.edu).

# Supplemental Figures

## Figure S1. Lead (Pb) concentrations

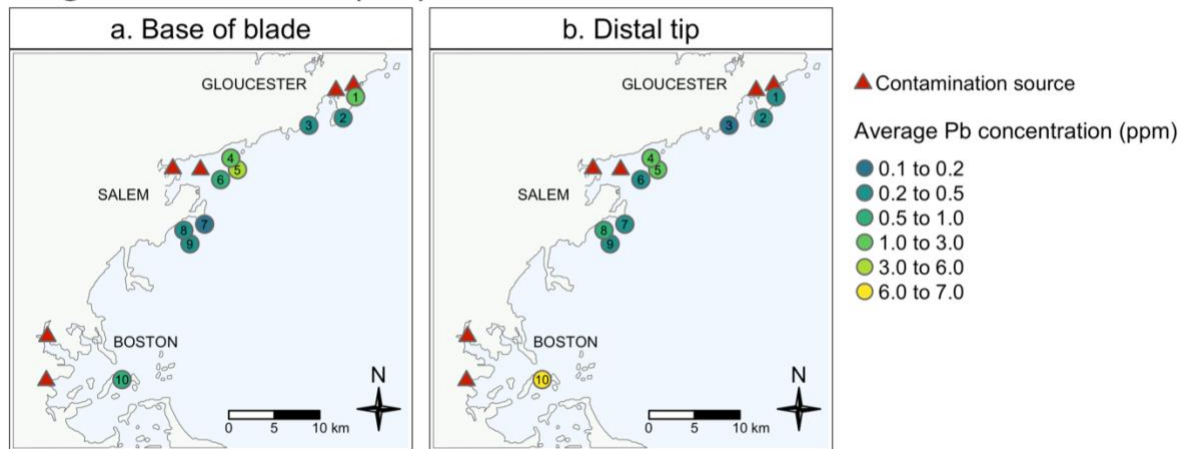

**Supplemental Figure S1. Average lead concentrations in wild sugar kelp.** Average lead concentrations (ppm) at the base (left panel) and distal tip (right panel) of sugar kelp blades at each of the ten wild kelp sample sites. Potential contamination sources are marked with red triangles. See Manuscript Table 1 for more details regarding each site. Maps were created using the ‘tmap’ package [64] in R Statistical Software v.4.0.4 <http://www.R-project.org/> [53].

## Figure S2. Mercury (Hg) concentrations

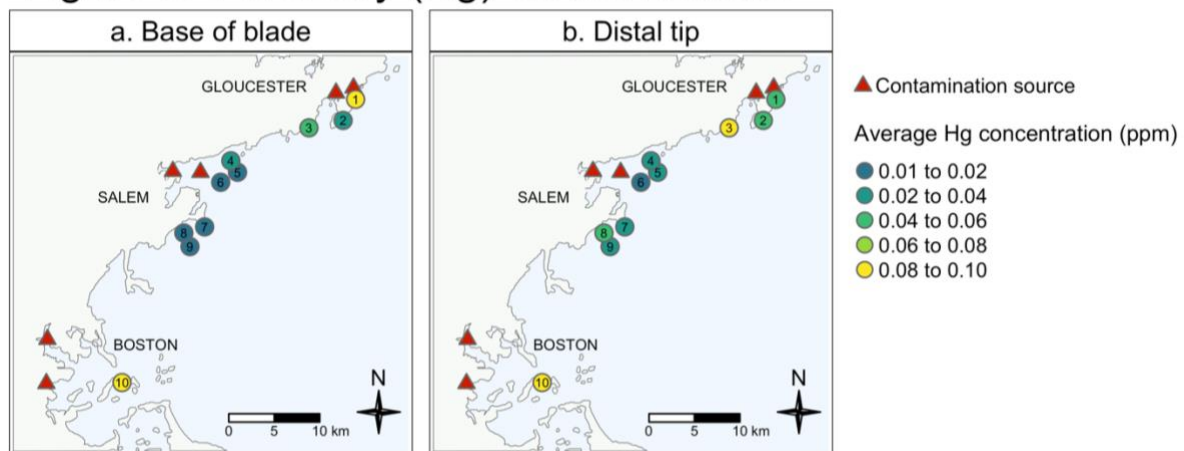

**Supplemental Figure S2. Average mercury concentrations in wild sugar kelp.** Average mercury concentrations (ppm) at the base (left panel) and distal tip (right panel) of sugar kelp blades at each of the ten wild kelp sample sites. Potential contamination sources are marked with red triangles. See Manuscript Table 1 for more details regarding each site. Maps were created using the ‘tmap’ package [64] in R Statistical Software v.4.0.4 <http://www.R-project.org/> [53].

## Supplemental Tables

**Table S1.** Analysis of variance table for generalized linear models with Gamma distributions and log links. Heavy metal concentration (ppm) is the response variable to sample site and blade location. Sample size = 117.

| <b>Metal</b>                   | <b>Factor</b>       | <b>df</b> | <b>Deviance</b> | <b>Residual Deviance</b> | <b>F Value</b> | <b>Pr(&gt;F)</b> |
|--------------------------------|---------------------|-----------|-----------------|--------------------------|----------------|------------------|
| <i>Total arsenic (AsT)</i>     | Site                | 10        | 2.05            | 10.39                    | 5.58           | <0.0001          |
|                                | Blade Location      | 1         | 6.53            | 3.86                     | 178.25         | <0.0001          |
|                                | Site*Blade Location | 10        | 0.65            | 3.21                     | 1.78           | 0.08             |
|                                | Residuals           | 104       | -               | 12.44                    | -              | -                |
| <i>Inorganic arsenic (iAs)</i> | Site                | 10        | 42.76           | 23.87                    | 43.16          | <0.0001          |
|                                | Blade Location      | 1         | 3.80            | 20.07                    | 38.32          | <0.0001          |
|                                | Site*Blade Location | 10        | 11.52           | 8.55                     | 11.63          | <0.0001          |
|                                | Residuals           | 104       | -               | 66.62                    | -              | -                |
| <i>Cadmium (Cd)</i>            | Site                | 10        | 4.48            | 73.97                    | 1.81           | 0.07             |
|                                | Blade Location      | 1         | 50.30           | 23.67                    | 203.19         | <0.0001          |
|                                | Site*Blade Location | 10        | 3.71            | 19.96                    | 1.50           | 0.15             |
|                                | Residuals           | 104       | -               | 78.44                    | -              | -                |
| <i>Mercury (Hg)</i>            | Site                | 10        | 33.36           | 27.07                    | 13.99          | <0.0001          |
|                                | Blade Location      | 1         | 2.29            | 24.78                    | 9.61           | 0.003            |
|                                | Site*Blade Location | 10        | 3.806           | 20.98                    | 1.60           | 0.12             |
|                                | Residuals           | 104       | -               | 60.43                    | -              | -                |
| <i>Lead (Pb)</i>               | Site                | 10        | 93.18           | 52.34                    | 20.62          | <0.0001          |
|                                | Blade Location      | 1         | 2.11            | 50.24                    | 4.66           | 0.034            |
|                                | Site*Blade Location | 10        | 15.58           | 34.66                    | 3.45           | 0.0008           |
|                                | Residuals           | 104       | -               | 145.52                   | -              | -                |

**Table S2a-b.** Averages  $\pm$  standard deviation for concentrations (ppm) of cadmium (Cd), total arsenic (AsT), and inorganic arsenic (iAs) (panel 3a); as well as lead (Pb) and mercury (Hg) (panel 3b) at each sample site and blade location.

| <b>S2a.</b>     | <b>AsT</b> |                   | <b>iAs</b>         |                 | <b>Cd</b>        |                 |                 |
|-----------------|------------|-------------------|--------------------|-----------------|------------------|-----------------|-----------------|
|                 | Site       | Distal Tip        | Base               | Distal Tip      | Base             | Distal Tip      | Base            |
| Atlantic Road   |            | 40.94 $\pm$ 4.65  | 71.32 $\pm$ 4.23   | 0.10 $\pm$ 0.03 | 0.16 $\pm$ 0.04  | 0.35 $\pm$ 0.22 | 1.91 $\pm$ 0.11 |
| Brace Rock      |            | 37.52 $\pm$ 8.62  | 50.83 $\pm$ 16.92  | 0.12 $\pm$ 0.05 | 0.10 $\pm$ 0.04  | 0.35 $\pm$ 0.10 | 0.86 $\pm$ 0.86 |
| Norman's Woe    |            | 47.12 $\pm$ 5.14  | 74.14 $\pm$ 14.86  | 0.09 $\pm$ 0.03 | 0.11 $\pm$ 0.04  | 0.49 $\pm$ 0.22 | 1.42 $\pm$ 0.72 |
| Misery Island   |            | 47.04 $\pm$ 6.46  | 59.00 $\pm$ 14.60  | 0.13 $\pm$ 0.02 | 0.10 $\pm$ 0.04  | 0.46 $\pm$ 0.17 | 1.38 $\pm$ 1.16 |
| Bakers Island   |            | 44.84 $\pm$ 4.27  | 76.03 $\pm$ 4.04   | 0.08 $\pm$ 0.02 | 0.13 $\pm$ 0.06  | 0.29 $\pm$ 0.09 | 1.74 $\pm$ 0.62 |
| Eagle Island    |            | 44.09 $\pm$ 7.47  | 101.12 $\pm$ 17.93 | 0.06 $\pm$ 0.01 | 0.08 $\pm$ 0.02  | 0.29 $\pm$ 0.17 | 2.40 $\pm$ 0.49 |
| Tinker's Island |            | 62.41 $\pm$ 4.37  | 36.69 $\pm$ 5.78   | 0.10 $\pm$ 0.03 | 0.05 $\pm$ 0.01  | 0.40 $\pm$ 0.20 | 1.45 $\pm$ 0.76 |
| Rams Island     |            | 47.53 $\pm$ 7.81  | 80.18 $\pm$ 15.77  | 0.19 $\pm$ 0.06 | 0.08 $\pm$ 0.04  | 0.46 $\pm$ 0.14 | 1.96 $\pm$ 0.69 |
| Great Pig Rocks |            | 63.41 $\pm$ 14.18 | 43.94 $\pm$ 9.53   | 0.14 $\pm$ 0.03 | 0.09 $\pm$ 0.04  | 0.46 $\pm$ 0.27 | 1.41 $\pm$ 0.28 |
| Gallops Island  |            | 43.20 $\pm$ 13.78 | 83.96 $\pm$ 5.69   | 0.99 $\pm$ 0.41 | 0.15 $\pm$ 0.03  | 0.23 $\pm$ 0.17 | 1.55 $\pm$ 0.44 |
| Northern Farmed |            | 38.45 $\pm$ 6.61  | 63.50 $\pm$ 15.83  | 0.26 $\pm$ 0.07 | 0.11 $\pm$ 0.03  | 0.27 $\pm$ 0.16 | 1.39 $\pm$ 0.34 |
| <b>S2b.</b>     |            | <b>Pb</b>         |                    | <b>Hg</b>       |                  |                 |                 |
| Site            | Distal tip | Base              | Distal tip         | Base            | Distal tip       | Base            |                 |
| Atlantic Road   |            | 0.45 $\pm$ 0.31   | 1.53 $\pm$ 1.47    | 0.05 $\pm$ 0.01 | 0.09 $\pm$ 0.06  |                 |                 |
| Brace Rock      |            | 0.29 $\pm$ 0.30   | 0.28 $\pm$ 0.30    | 0.05 $\pm$ 0.04 | 0.03 $\pm$ 0.02  |                 |                 |
| Norman's Woe    |            | 0.17 $\pm$ 0.03   | 0.24 $\pm$ 0.28    | 0.09 $\pm$ 0.08 | 0.05 $\pm$ 0.03  |                 |                 |
| Misery Island   |            | 2.86 $\pm$ 4.05   | 1.42 $\pm$ 0.63    | 0.03 $\pm$ 0.01 | 0.02 $\pm$ 0.01  |                 |                 |
| Bakers Island   |            | 1.75 $\pm$ 0.65   | 3.89 $\pm$ 2.19    | 0.03 $\pm$ 0.00 | 0.02 $\pm$ 0.01  |                 |                 |
| Eagle Island    |            | 0.48 $\pm$ 0.19   | 0.52 $\pm$ 0.24    | 0.01 $\pm$ 0.01 | 0.02 $\pm$ 0.01  |                 |                 |
| Tinker's Island |            | 0.28 $\pm$ 0.04   | 0.19 $\pm$ 0.07    | 0.02 $\pm$ 0.01 | 0.02 $\pm$ 0.001 |                 |                 |
| Rams Island     |            | 0.93 $\pm$ 0.64   | 0.46 $\pm$ 0.32    | 0.04 $\pm$ 0.03 | 0.02 $\pm$ 0.01  |                 |                 |
| Great Pig Rocks |            | 0.34 $\pm$ 0.12   | 0.34 $\pm$ 0.22    | 0.03 $\pm$ 0.01 | 0.02 $\pm$ 0.00  |                 |                 |
| Gallops Island  |            | 6.28 $\pm$ 2.76   | 0.83 $\pm$ 0.16    | 0.09 $\pm$ 0.02 | 0.09 $\pm$ 0.03  |                 |                 |
| Northern Farmed |            | 1.76 $\pm$ 0.64   | 0.82 $\pm$ 0.38    | 0.06 $\pm$ 0.02 | 0.04 $\pm$ 0.01  |                 |                 |

**Table S3.** Post-hoc contrasts of concentrations of heavy metals (ppm) at each site in samples taken from the base blades compared to samples taken at the distal tip of blades. Results are given on the log scale.

| <b>Metal</b>         | <b>Sample site</b>       | <b>estimate</b>  | <b>SE</b> | <b>Z-ratio</b> | <b>p-value</b> |         |
|----------------------|--------------------------|------------------|-----------|----------------|----------------|---------|
| <i>Total arsenic</i> | Atlantic Road**          | 0.56             | 0.16      | 3.55           | 0.0004         |         |
|                      | Baker's***               | 0.53             | 0.13      | 4.11           | <0.0001        |         |
|                      | Brace Rock*              | 0.30             | 0.12      | 2.51           | 0.01           |         |
|                      | Eagle***                 | 0.83             | 0.12      | 6.85           | <0.0001        |         |
|                      | Gallops***               | 0.66             | 0.12      | 5.49           | <0.0001        |         |
|                      | Misery                   | 0.23             | 0.12      | 1.87           | 0.06           |         |
|                      | North Farmed***          | 0.50             | 0.10      | 5.24           | <0.0001        |         |
|                      | Norman's Woe**           | 0.45             | 0.12      | 3.74           | 0.0002         |         |
|                      | Pigs                     | 0.37             | 0.19      | 1.92           | 0.06           |         |
|                      | Rams***                  | 0.52             | 0.12      | 4.32           | <0.0001        |         |
|                      | Tinkers***               | 0.53             | 0.12      | 4.39           | <0.0001        |         |
|                      | <i>Inorganic arsenic</i> | Atlantic Road*   | 0.54      | 0.26           | 2.09           | 0.04    |
|                      |                          | Baker's*         | 0.45      | 0.21           | 2.13           | 0.03    |
| Brace Rock           |                          | -0.21            | 0.20      | -1.07          | 0.29           |         |
| Eagle                |                          | 0.29             | 0.20      | 1.46           | 0.14           |         |
| Gallops***           |                          | -1.89            | 0.20      | -9.50          | <0.0001        |         |
| Misery               |                          | -0.26            | 0.20      | -1.31          | 0.19           |         |
| North Farmed***      |                          | -0.85            | 0.16      | -5.42          | <0.0001        |         |
| Norman's Woe         |                          | 0.16             | 0.20      | 0.78           | 0.434          |         |
| Pigs                 |                          | -0.46            | 0.32      | -1.46          | 0.15           |         |
| Rams***              |                          | -0.83            | 0.20      | -4.15          | <0.0001        |         |
| Tinkers**            |                          | -0.74            | 0.20      | -3.74          | 0.0002         |         |
| <i>Cadmium</i>       |                          | Atlantic Road*** | 1.69      | 0.41           | 4.15           | <0.0001 |
|                      |                          | Baker's***       | 1.79      | 0.33           | 5.36           | <0.0001 |
|                      | Brace Rock**             | 0.90             | 0.32      | 2.87           | 0.004          |         |
|                      | Eagle***                 | 2.10             | 0.32      | 6.78           | <0.0001        |         |
|                      | Gallops***               | 1.93             | 0.32      | 6.12           | <0.0001        |         |
|                      | Misery**                 | 1.07             | 0.32      | 3.40           | 0.0007         |         |
|                      | North Farmed***          | 1.62             | 0.25      | 6.53           | <0.0001        |         |
|                      | Norman's Woe**           | 1.07             | 0.32      | 3.40           | 0.0007         |         |
|                      | Pigs*                    | 1.11             | 0.50      | 2.23           | 0.02           |         |
|                      | Rams***                  | 1.41             | 0.32      | 4.48           | <0.0001        |         |
|                      | Tinkers***               | 1.23             | 0.32      | 4.07           | <0.0001        |         |
|                      | <i>Lead</i>              | Atlantic Road*   | 1.21      | 0.55           | 2.21           | 0.03    |
|                      |                          | Baker's          | 0.80      | 0.45           | 1.77           | 0.08    |
| Brace Rock           |                          | -0.07            | 0.43      | -0.15          | 0.88           |         |
| Eagle                |                          | 0.08             | 0.43      | 0.20           | 0.85           |         |
| Gallops***           |                          | -2.02            | 0.43      | -4.75          | <0.0001        |         |
| Misery               |                          | -0.70            | 0.43      | -1.65          | 0.10           |         |
| North Farmed*        |                          | -0.76            | 0.34      | -2.27          | 0.02           |         |
| Norman's Woe         |                          | 0.36             | 0.43      | 0.85           | 0.39           |         |
| Pigs                 |                          | -0.009           | 0.62      | -0.013         | 0.99           |         |
| Rams                 |                          | -0.70            | 0.43      | -1.64          | 0.10           |         |
| Tinkers              |                          | -0.40            | 0.43      | -0.94          | 0.35           |         |
| <i>Mercury</i>       |                          | Atlantic Road    | 0.66      | 0.40           | 1.66           | 0.10    |
|                      |                          | Baker's          | -0.23     | 0.33           | -0.70          | 0.48    |
|                      | Brace Rock*              | -0.64            | 0.31      | -2.06          | 0.04           |         |
|                      | Eagle                    | 0.29             | 0.31      | 0.95           | 0.34           |         |
|                      | Gallops                  | 0.03             | 0.31      | 0.10           | 0.92           |         |
|                      | Misery                   | -0.31            | 0.31      | -1.00          | 0.32           |         |
|                      | North Farmed             | -0.38            | 0.24      | -1.56          | 0.12           |         |
|                      | Norman's Woe             | -0.58            | 0.31      | -1.87          | 0.06           |         |
|                      | Pigs                     | -0.49            | 0.49      | -1.00          | 0.32           |         |
|                      | Rams**                   | -0.84            | 0.31      | -2.72          | 0.007          |         |
|                      | Tinkers                  | -0.47            | 0.31      | -1.51          | 0.13           |         |

**Table S4.** Post-hoc contrasts of concentrations of total arsenic (AsT, ppm) in samples taken from different sample sites, but not accounting for blade location. Results are given on the log scale.

| Contrast      | estimate | SE   | Z-ratio | p-value |
|---------------|----------|------|---------|---------|
| ATL – BK      | -0.08    | 0.10 | -0.77   | 1.00    |
| ATL – BRK     | 0.21     | 0.10 | 2.15    | 0.54    |
| ATL – EAG     | -0.21    | 0.10 | -2.14   | 0.55    |
| ATL – GAL     | -0.11    | 0.10 | -1.10   | 0.99    |
| ATL – MIS     | 0.03     | 0.10 | 0.26    | 1.00    |
| ATL – NFARM   | 0.09     | 0.09 | 0.98    | 1.00    |
| ATL – NORM    | -0.09    | 0.10 | -0.91   | 1.00    |
| ATL – PIG     | 0.02     | 0.12 | 0.19    | 1.00    |
| ATL – RAM     | -0.13    | 0.10 | -1.35   | 0.96    |
| ATL – TKR     | 0.12     | 0.10 | 1.23    | 0.98    |
| BK – BRK *    | 0.29     | 0.09 | 3.29    | 0.04    |
| BK – EAG      | -0.13    | 0.09 | -1.52   | 0.91    |
| BK – GAL      | -0.03    | 0.09 | -0.35   | 1.00    |
| BK – MIS      | 0.10     | 0.09 | 1.16    | 0.99    |
| BK – NFARM    | 0.17     | 0.08 | 2.08    | 0.59    |
| BK – NORM     | -0.01    | 0.09 | -0.14   | 1.00    |
| BK – PIG      | 0.10     | 0.12 | 0.87    | 1.00    |
| BK – RAM      | -0.06    | 0.09 | -0.63   | 1.00    |
| BK – TKR      | 0.20     | 0.09 | 2.25    | 0.47    |
| BRK – EAG *   | -0.42    | 0.09 | -4.96   | <0.0001 |
| BRK – GAL *   | -0.32    | 0.09 | -3.75   | 0.01    |
| BRK – MIS     | -0.19    | 0.09 | -2.19   | 0.51    |
| BRK – NFARM   | -0.12    | 0.08 | -1.60   | 0.88    |
| BRK – NORM*   | -0.30    | 0.09 | -3.54   | 0.02    |
| BRK – PIG     | -0.19    | 0.11 | -1.67   | 0.85    |
| BRK – RAM**   | -0.35    | 0.09 | -4.04   | 0.003   |
| BRK – TKR     | -0.09    | 0.09 | -1.07   | 0.99    |
| EAG – GAL     | 0.10     | 0.09 | 1.21    | 0.98    |
| EAG – MIS     | 0.24     | 0.09 | 2.77    | 0.17    |
| EAG – NFARM** | 0.30     | 0.08 | 3.90    | 0.005   |
| EAG – NORM    | 0.12     | 0.09 | 1.42    | 0.94    |
| EAG – PIG     | 0.24     | 0.11 | 2.08    | 0.60    |
| EAG – RAM     | 0.08     | 0.09 | 0.92    | 1.00    |
| EAG – TKR**   | 0.33     | 0.09 | 3.89    | 0.005   |
| GAL – MIS     | 0.13     | 0.09 | 1.56    | 0.90    |
| GAL – NFARM   | 0.20     | 0.08 | 2.56    | 0.27    |
| GAL – NORM    | 0.02     | 0.09 | 0.22    | 1.00    |
| GAL – PIG     | 0.13     | 0.11 | 1.16    | 0.99    |
| GAL – RAM     | -0.02    | 0.09 | -0.29   | 1.00    |
| GAL – TKR     | 0.23     | 0.09 | 2.69    | 0.21    |
| MIS – NFARM   | 0.06     | 0.08 | 0.83    | 1.00    |
| MIS – NORM    | -0.12    | 0.09 | -1.34   | 0.96    |
| MIS – PIG     | -0.00    | 0.11 | -0.02   | 1.00    |
| MIS – RAM     | -0.16    | 0.09 | -1.85   | 0.75    |
| MIS – TKR     | 0.10     | 0.09 | 1.12    | 0.99    |
| NFARM – NORM  | -0.18    | 0.08 | -2.32   | 0.42    |
| NFARM – PIG   | -0.07    | 0.11 | -0.62   | 1.00    |
| NFARM – RAM   | -0.22    | 0.08 | -2.89   | 0.13    |
| NFARM – TKR   | 0.03     | 0.08 | 0.42    | 1.00    |
| NORM – PIG    | 0.11     | 0.11 | 1.00    | 1.00    |
| NORM – RAM    | -0.04    | 0.09 | -0.51   | 1.00    |
| NORM – TKR    | 0.21     | 0.09 | 2.47    | 0.32    |
| PIG – RAM     | -0.16    | 0.11 | -1.38   | 0.95    |
| PIG – TKR     | 0.10     | 0.11 | 0.87    | 1.00    |
| RAM – TKR     | 0.25     | 0.09 | 2.98    | 0.10    |

**Table S5.** Average  $\pm$  standard deviation (SD) of concentrations (ppm) of heavy metals in our preliminary Southern Farmed samples from 2018, and comparison of those averages to relevant standards. Preliminary samples were only collected from the mid-part of each blade.

|                                        | AsT (n=12) | iAs (n=4)           | Cd (n=12)       | Pb (n=12)             | Hg (n=12)       |
|----------------------------------------|------------|---------------------|-----------------|-----------------------|-----------------|
| Average $\pm$ SD (ppm)                 | 32 $\pm$ 2 | 0.0006 $\pm$ 0.0003 | 0.72 $\pm$ 0.15 | 0.82 $\pm$ 0.54       | 0.05 $\pm$ 0.03 |
| % that exceeded MCL                    | 0%         | 0%                  | 17%             | 0%                    | 0%              |
| % of MADL                              | -          | -                   | 17.5%           | 164%                  | 16.6%           |
| % of NSRL                              | -          | 0.006%              | -               | 5.5%                  | -               |
| <b>Grams of dried kelp safe to eat</b> | -          | <b>16,666g</b>      | <b>5.7g</b>     | <b>18.18g or 0.6g</b> | <b>6g</b>       |

**Table S6.** Average percent ( $\pm$  standard deviation) of inorganic arsenic (iAs) concentration in relation to total arsenic (AsT) concentration for each sample site and blade location.

| <b>Site</b>           | <b>Base of blade</b> | <b>Distal tip</b> |
|-----------------------|----------------------|-------------------|
| Gallops Island (GAL)  | 0.18 $\pm$ 0.03      | 2.26 $\pm$ 0.69   |
| Great Pig Rock (PIG)  | 0.14 $\pm$ 0.09      | 0.34 $\pm$ 0.17   |
| Rams Island (RAM)     | 0.11 $\pm$ 0.05      | 0.40 $\pm$ 0.14   |
| Tinkers Island (TKR)  | 0.08 $\pm$ 0.02      | 0.28 $\pm$ 0.09   |
| Eagle Island (EAG)    | 0.08 $\pm$ 0.02      | 0.14 $\pm$ 0.03   |
| Baker Island (BK)     | 0.17 $\pm$ 0.08      | 0.18 $\pm$ 0.03   |
| Misery Island (MIS)   | 0.19 $\pm$ 0.12      | 0.28 $\pm$ 0.07   |
| Norman's Woe (NORM)   | 0.14 $\pm$ 0.03      | 0.20 $\pm$ 0.06   |
| Brace Rock (BRK)      | 0.23 $\pm$ 0.16      | 0.32 $\pm$ 0.15   |
| Atlantic Road (ATL)   | 0.23 $\pm$ 0.04      | 0.23 $\pm$ 0.04   |
| Northern Farm (NFARM) | 0.20 $\pm$ 0.09      | 0.70 $\pm$ 0.21   |



**Table S7.** Post-hoc contrasts for inorganic arsenic (iAs) concentrations (ppm) for samples taken at different sample sites, but not accounting for blade location. Results are presented on the log scale.

| Contrast       | estimate | SE   | Z-ratio | p-value |
|----------------|----------|------|---------|---------|
| ATL – BK       | 0.21     | 0.17 | 1.27    | 0.97    |
| ATL – BRK      | 0.15     | 0.16 | 0.95    | 1.00    |
| ATL – EAG*     | 0.57     | 0.16 | 3.48    | 0.02    |
| ATL – GAL***   | -1.12    | 0.16 | -6.91   | <0.0001 |
| ATL – MIS      | 0.11     | 0.16 | 0.66    | 1.00    |
| ATL – NFARM    | -0.32    | 0.15 | -2.13   | 0.56    |
| ATL – NORM     | 0.24     | 0.16 | 1.45    | 0.94    |
| ATL – PIG      | 0.13     | 0.20 | 0.65    | 1.00    |
| ATL – RAM      | 0.02     | 0.16 | 0.12    | 1.00    |
| ATL – TKR**    | 0.61     | 0.16 | 3.73    | 0.009   |
| BK – BRK       | -0.06    | 0.15 | -0.39   | 1.00    |
| BK – EAG       | 0.35     | 0.15 | 2.44    | 0.34    |
| BK – GAL***    | -1.33    | 0.15 | -9.19   | <0.0001 |
| BK – MIS       | -0.10    | 0.15 | -0.72   | 1.00    |
| BK – NFARM**   | -0.53    | 0.13 | -4.04   | 0.003   |
| BK – NORM      | 0.02     | 0.15 | 0.17    | 1.00    |
| BK – PIG       | -0.08    | 0.19 | -0.42   | 1.00    |
| BK – RAM       | -0.19    | 0.15 | -1.31   | 0.97    |
| BK – TKR       | 0.40     | 0.15 | 2.73    | 0.19    |
| BRK – EAG      | 0.41     | 0.14 | 2.92    | 0.12    |
| BRK – GAL***   | -1.28    | 0.14 | -9.07   | <0.0001 |
| BRK – MIS      | -0.05    | 0.14 | -0.34   | 1.00    |
| BRK – NFARM**  | -0.47    | 0.13 | -3.74   | 0.009   |
| BRK – NORM     | 0.08     | 0.14 | 0.58    | 1.00    |
| BRK – PIG      | -0.02    | 0.19 | -0.12   | 1.00    |
| BRK – RAM      | -0.13    | 0.14 | -0.95   | 1.00    |
| BRK – TKR      | 0.45     | 0.14 | 3.22    | 0.05    |
| EAG – GAL***   | -1.69    | 0.14 | -11.99  | <0.0001 |
| EAG – MIS*     | -0.46    | 0.14 | -3.26   | 0.044   |
| EAG – NFARM*** | -0.89    | 0.13 | -6.98   | <0.0001 |
| EAG – NORM     | -0.33    | 0.14 | -2.34   | 0.40    |
| EAG – PIG      | -0.43    | 0.19 | -2.33   | 0.41    |
| EAG – RAM**    | -0.54    | 0.14 | -3.87   | 0.005   |
| EAG – TKR      | 0.04     | 0.14 | 0.30    | 1.00    |
| GAL – MIS***   | 1.23     | 0.14 | 8.73    | <0.0001 |
| GAL – NFARM*** | 0.80     | 0.13 | 6.32    | <0.0001 |
| GAL – NORM***  | 1.36     | 0.14 | 9.65    | <0.0001 |
| GAL – PIG***   | 1.25     | 0.19 | 6.73    | <0.0001 |
| GAL – RAM***   | 1.14     | 0.14 | 8.12    | <0.0001 |
| GAL – TKR***   | 1.73     | 0.14 | 12.29   | <0.0001 |
| MIS – NFARM*   | -0.43    | 0.13 | -3.37   | 0.031   |
| MIS – NORM     | 0.13     | 0.14 | 0.92    | 1.00    |
| MIS – PIG      | 0.03     | 0.19 | 0.13    | 1.00    |
| MIS – RAM      | -0.09    | 0.14 | -0.61   | 1.00    |
| MIS – TKR*     | 0.50     | 0.14 | 3.56    | 0.017   |
| NFARM – NORM** | 0.56     | 0.13 | 4.38    | 0.0006  |
| NFARM – PIG    | 0.45     | 0.18 | 2.57    | 0.26    |
| NFARM – RAM    | 0.34     | 0.13 | 2.69    | 0.20    |
| NFARM – TKR*** | 0.93     | 0.13 | 7.31    | <0.0001 |
| NORM – PIG     | -0.10    | 0.19 | -0.56   | 1.00    |
| NORM – RAM     | -0.22    | 0.14 | -1.53   | 0.91    |
| NORM – TKR     | 0.37     | 0.14 | 2.64    | 0.23    |
| PIG – RAM      | -0.11    | 0.19 | -0.60   | 1.00    |
| PIG – TKR      | 0.48     | 0.19 | 2.55    | 0.27    |
| RAM – TKR**    | 0.59     | 0.14 | 4.17    | 0.002   |

**Table S8.** Post-hoc contrasts for lead (Pb) concentrations (ppm) for samples taken at different sample sites, but not accounting for blade location. Results are presented on the log scale.

| Contrast        | estimate | SE   | Z-ratio | p-value |
|-----------------|----------|------|---------|---------|
| ATL – BK        | -1.15    | 0.36 | -3.22   | 0.05    |
| ATL – BRK       | 1.07     | 0.35 | 3.08    | 0.07    |
| ATL – EAG       | 0.50     | 0.35 | 1.45    | 0.93    |
| ATL – GAL       | -1.01    | 0.35 | -2.91   | 0.12    |
| ATL – MIS       | -0.89    | 0.35 | -2.55   | 0.27    |
| ATL – NFARM     | -0.37    | 0.32 | -1.14   | 0.99    |
| ATL – NORM**    | 1.42     | 0.35 | 4.10    | 0.002   |
| ATL – PIG       | 0.90     | 0.43 | 2.07    | 0.60    |
| ATL – RAM       | 0.24     | 0.35 | 0.68    | 1.00    |
| ATL – TKR*      | 1.28     | 0.35 | 3.68    | 0.01    |
| BK – BRK***     | 2.21     | 0.31 | 7.15    | <0.0001 |
| BK – EAG***     | 1.65     | 0.31 | 5.32    | <0.0001 |
| BK – GAL        | 0.13     | 0.31 | 0.43    | 1.00    |
| BK – MIS        | 0.26     | 0.31 | 0.84    | 1.00    |
| BK – NFARM      | 0.78     | 0.28 | 2.77    | 0.17    |
| BK – NORM***    | 2.57     | 0.31 | 8.29    | <0.0001 |
| BK – PIG***     | 2.04     | 0.40 | 5.05    | <0.0001 |
| BK – RAM**      | 1.38     | 0.31 | 4.46    | 0.0004  |
| BK – TKR***     | 2.42     | 0.31 | 7.82    | <0.0001 |
| BRK – EAG       | -0.57    | 0.30 | -1.88   | 0.73    |
| BRK – GAL***    | -2.08    | 0.30 | -6.92   | <0.0001 |
| BRK – MIS***    | -1.96    | 0.30 | -6.50   | <0.0001 |
| BRK – NFARM***  | -1.44    | 0.27 | -5.30   | <0.0001 |
| BRK – NORM      | 0.35     | 0.30 | 1.18    | 0.99    |
| BRK – PIG       | -0.17    | 0.40 | -0.43   | 1.00    |
| BRK – RAM       | -0.83    | 0.30 | -2.78   | 0.17    |
| BRK – TKR       | 0.21     | 0.30 | 0.69    | 1.00    |
| EAG – GAL***    | -1.52    | 0.30 | -5.04   | <0.0001 |
| EAG – MIS**     | -1.39    | 0.30 | -4.62   | 0.002   |
| EAG – NFARM     | -0.87    | 0.27 | -3.21   | 0.05    |
| EAG – NORM      | 0.92     | 0.30 | 3.06    | 0.08    |
| EAG – PIG       | 0.39     | 0.40 | 0.99    | 1.00    |
| EAG – RAM       | -0.27    | 0.30 | -0.89   | 1.00    |
| EAG – TKR       | 0.77     | 0.30 | 2.57    | 0.27    |
| GAL – MIS       | 0.13     | 0.30 | 0.42    | 1.00    |
| GAL – NFARM     | 0.64     | 0.27 | 2.38    | 0.38    |
| GAL – NORM***   | 2.43     | 0.30 | 8.10    | <0.0001 |
| GAL – PIG***    | 1.91     | 0.40 | 4.80    | 0.0001  |
| GAL – RAM**     | 1.25     | 0.30 | 4.15    | 0.002   |
| GAL – TKR***    | 2.29     | 0.30 | 7.61    | <0.0001 |
| MIS – NFARM     | 0.52     | 0.27 | 1.92    | 0.71    |
| MIS – NORM***   | 2.31     | 0.30 | 7.68    | <0.0001 |
| MIS – PIG**     | 1.78     | 0.40 | 4.49    | 0.0004  |
| MIS – RAM**     | 1.12     | 0.30 | 3.73    | 0.009   |
| MIS – TKR***    | 2.16     | 0.30 | 7.19    | <0.0001 |
| NFARM – NORM*** | 1.79     | 0.27 | 6.60    | <0.0001 |
| NFARM – PIG*    | 1.27     | 0.38 | 3.37    | 0.03    |
| NFARM – RAM     | 0.60     | 0.27 | 2.22    | 0.49    |
| NFARM – TKR***  | 1.64     | 0.27 | 6.06    | <0.0001 |
| NORM – PIG      | -0.52    | 0.40 | -1.32   | 0.97    |
| NORM – RAM**    | -1.19    | 0.30 | -3.95   | 0.004   |
| NORM – TKR      | -0.15    | 0.30 | -0.49   | 1.00    |
| PIG – RAM       | -0.66    | 0.40 | -1.67   | 0.85    |
| PIG – TKR       | 0.38     | 0.40 | 0.95    | 1.00    |
| RAM – TKR*      | 1.04     | 0.30 | 3.46    | 0.023   |

**Table S9.** Post-hoc contrasts of lead (Pb) concentration (ppm) in samples taken from the base of sugar kelp blades at different sample sites. Results are given on the log scale.

| BASE OF BLADE |          |      |         |         |
|---------------|----------|------|---------|---------|
| Contrast      | estimate | SE   | Z-ratio | p-value |
| ATL – BK      | -0.94    | 0.49 | -1.91   | 0.71    |
| ATL – BRK*    | 1.71     | 0.49 | 3.48    | 0.02    |
| ATL – EAG     | 1.07     | 0.49 | 2.18    | 0.52    |
| ATL – GAL     | 0.61     | 0.49 | 1.23    | 0.98    |
| ATL – MIS     | 0.07     | 0.49 | 0.15    | 1.00    |
| ATL – NFARM   | 0.62     | 0.46 | 1.37    | 0.96    |
| ATL – NORM*   | 1.85     | 0.49 | 3.77    | 0.01    |
| ATL – PIG     | 1.51     | 0.61 | 2.46    | 0.33    |
| ATL – RAM     | 1.19     | 0.49 | 2.42    | 0.35    |
| ATL – TKR**   | 2.08     | 0.49 | 4.24    | 0.001   |
| BK – BRK***   | 2.65     | 0.43 | 6.22    | <0.0001 |
| BK – EAG***   | 2.01     | 0.43 | 4.72    | 0.0001  |
| BK – GAL*     | 1.54     | 0.43 | 3.63    | 0.01    |
| BK – MIS      | 1.01     | 0.43 | 2.37    | 0.38    |
| BK – NFARM**  | 1.56     | 0.38 | 4.07    | 0.002   |
| BK – NORM***  | 2.78     | 0.43 | 6.55    | <0.0001 |
| BK – PIG**    | 2.45     | 0.56 | 4.35    | 0.0007  |
| BK – RAM***   | 2.13     | 0.43 | 5.00    | <0.0001 |
| BK – TKR***   | 3.02     | 0.43 | 7.10    | <0.0001 |
| BRK – EAG     | -0.64    | 0.43 | -1.50   | 0.92    |
| BRK – GAL     | -1.10    | 0.43 | -2.59   | 0.25    |
| BRK – MIS**   | -1.64    | 0.43 | -3.85   | 0.005   |
| BRK – NFARM   | -1.09    | 0.38 | -2.84   | 0.14    |
| BRK – NORM    | 0.14     | 0.43 | 0.33    | 1.00    |
| BRK – PIG     | -0.20    | 0.56 | -0.35   | 1.00    |
| BRK – RAM     | -0.52    | 0.43 | -1.22   | 0.98    |
| BRK – TKR     | 0.37     | 0.43 | 0.88    | 1.00    |
| EAG – GAL     | -0.46    | 0.43 | -1.09   | 0.99    |
| EAG – MIS     | -1.00    | 0.43 | -2.35   | 0.40    |
| EAG – NFARM   | -0.45    | 0.38 | -1.17   | 0.99    |
| EAG – NORM    | 0.78     | 0.43 | 1.83    | 0.76    |
| EAG – PIG     | 0.44     | 0.56 | 0.78    | 1.00    |
| EAG – RAM     | 0.12     | 0.43 | 0.28    | 1.00    |
| EAG – TKR     | 1.01     | 0.43 | 2.38    | 0.38    |
| GAL – MIS     | -0.53    | 0.43 | -1.26   | 0.98    |
| GAL – NFARM   | 0.02     | 0.38 | 0.04    | 1.00    |
| GAL – NORM    | 1.24     | 0.43 | 2.92    | 0.12    |
| GAL – PIG     | 0.90     | 0.56 | 1.61    | 0.88    |
| GAL – RAM     | 0.58     | 0.43 | 1.37    | 0.95    |
| GAL – TKR*    | 1.48     | 0.43 | 3.47    | 0.02    |
| MIS – NFARM   | 0.55     | 0.38 | 1.44    | 0.94    |
| MIS – NORM**  | 1.78     | 0.43 | 4.18    | 0.002   |
| MIS – PIG     | 1.44     | 0.56 | 2.56    | 0.27    |
| MIS – RAM     | 1.12     | 0.43 | 2.63    | 0.23    |
| MIS – TKR***  | 2.01     | 0.43 | 4.73    | 0.0001  |
| NFARM – NORM  | 1.23     | 0.38 | 3.20    | 0.05    |
| NFARM – PIG   | 0.89     | 0.53 | 1.67    | 0.85    |
| NFARM – RAM   | 0.57     | 0.38 | 1.48    | 0.93    |
| NFARM – TKR** | 1.46     | 0.38 | 3.81    | 0.007   |
| NORM – PIG    | -0.34    | 0.56 | -0.60   | 1.00    |
| NORM – RAM    | -0.66    | 0.43 | -1.55   | 0.90    |
| NORM – TKR    | 0.24     | 0.43 | 0.55    | 1.00    |
| PIG – RAM     | -0.32    | 0.56 | -0.57   | 1.00    |
| PIG – TKR     | 0.57     | 0.56 | 1.02    | 1.00    |
| RAM – TKR     | 0.89     | 0.43 | 2.10    | 0.58    |

**Table S10.** Post-hoc contrasts of lead (Pb) concentration (ppm) in samples taken from the distal tip of sugar kelps blades at different sample sites. Results are given on the log scale.

| DISTAL TIP OF BLADE |          |      |         |         |
|---------------------|----------|------|---------|---------|
| Contrast            | estimate | SE   | Z-ratio | p-value |
| ATL – BK            | -1.35    | 0.51 | -2.64   | 0.23    |
| ATL – BRK           | 0.43     | 0.49 | 0.88    | 1.00    |
| ATL – EAG           | -0.06    | 0.49 | -0.12   | 1.00    |
| ATL – GAL           | -2.63    | 0.49 | -5.35   | 0.00    |
| ATL – MIS           | -1.84    | 0.49 | -3.75   | 0.01    |
| ATL – NFARM         | -1.35    | 0.46 | -2.98   | 0.10    |
| ATL – NORM          | 1.00     | 0.49 | 2.03    | 0.63    |
| ATL – PIG           | 0.29     | 0.61 | 0.47    | 1.00    |
| ATL – RAM           | -0.72    | 0.49 | -1.47   | 0.93    |
| ATL – TKR           | 0.47     | 0.49 | 0.96    | 1.00    |
| BK – BRK *          | 1.78     | 0.45 | 3.96    | 0.00    |
| BK – EAG            | 1.29     | 0.45 | 2.87    | 0.13    |
| BK – GAL            | -1.27    | 0.45 | -2.83   | 0.15    |
| BK – MIS            | -0.49    | 0.45 | -1.09   | 0.99    |
| BK – NFARM          | -0.00    | 0.41 | -0.00   | 1.00    |
| BK – NORM           | 2.35     | 0.45 | 5.21    | 0.00    |
| BK – PIG            | 1.64     | 0.58 | 2.82    | 0.15    |
| BK – RAM            | 0.63     | 0.45 | 1.41    | 0.95    |
| BK – TKR            | 1.82     | 0.45 | 4.04    | 0.00    |
| BRK – EAG *         | -0.49    | 0.43 | -1.16   | 0.99    |
| BRK – GAL*          | -3.06    | 0.43 | -7.20   | 0.00    |
| BRK – MIS           | -2.27    | 0.43 | -5.35   | 0.00    |
| BRK – NFARM         | -1.79    | 0.38 | -4.66   | 0.00    |
| BRK – NORM*         | 0.57     | 0.43 | 1.33    | 0.96    |
| BRK – PIG           | -0.14    | 0.56 | -0.25   | 1.00    |
| BRK – RAM**         | -1.15    | 0.43 | -2.70   | 0.20    |
| BRK – TKR           | 0.04     | 0.43 | 0.09    | 1.00    |
| EAG – GAL           | -2.57    | 0.43 | -6.04   | 0.00    |
| EAG – MIS           | -1.78    | 0.43 | -4.19   | 0.00    |
| EAG – NFARM**       | -1.29    | 0.38 | -3.38   | 0.03    |
| EAG – NORM          | 1.06     | 0.43 | 2.49    | 0.31    |
| EAG – PIG           | 0.35     | 0.56 | 0.62    | 1.00    |
| EAG – RAM           | -0.66    | 0.43 | -1.55   | 0.90    |
| EAG – TKR**         | 0.53     | 0.43 | 1.25    | 0.98    |
| GAL – MIS           | 0.79     | 0.43 | 1.85    | 0.75    |
| GAL – NFARM         | 1.27     | 0.38 | 3.32    | 0.04    |
| GAL – NORM          | 3.63     | 0.43 | 8.53    | 0.00    |
| GAL – PIG           | 2.92     | 0.56 | 5.19    | 0.00    |
| GAL – RAM           | 1.91     | 0.43 | 4.49    | 0.00    |
| GAL – TKR           | 3.10     | 0.43 | 7.29    | 0.00    |
| MIS – NFARM         | 0.49     | 0.38 | 1.27    | 0.97    |
| MIS – NORM          | 2.84     | 0.43 | 6.68    | 0.00    |
| MIS – PIG           | 2.13     | 0.56 | 3.79    | 0.01    |
| MIS – RAM           | 1.12     | 0.43 | 2.64    | 0.23    |
| MIS – TKR           | 2.31     | 0.43 | 5.44    | 0.00    |
| NFARM – NORM        | 2.35     | 0.38 | 6.14    | 0.00    |
| NFARM – PIG         | 1.64     | 0.53 | 3.09    | 0.07    |
| NFARM – RAM         | 0.64     | 0.38 | 1.66    | 0.86    |
| NFARM – TKR         | 1.82     | 0.38 | 4.76    | 0.00    |
| NORM – PIG          | -0.71    | 0.56 | -1.26   | 0.97    |
| NORM – RAM          | -1.72    | 0.43 | -4.04   | 0.00    |
| NORM – TKR          | -0.53    | 0.43 | -1.24   | 0.98    |
| PIG – RAM           | -1.01    | 0.56 | -1.79   | 0.79    |
| PIG – TKR           | 0.18     | 0.56 | 0.32    | 1.00    |
| RAM – TKR           | 1.19     | 0.43 | 2.80    | 0.16    |

**Table S11.** Post-hoc contrasts for mercury (Hg) concentrations (ppm) for samples taken at different sample sites, but not accounting for blade location. Results are presented on the log scale.

| Contrast       | estimate | SE   | Z-ratio | p-value |
|----------------|----------|------|---------|---------|
| ATL – BK**     | 1.13     | 0.26 | 4.40    | 0.0006  |
| ATL – BRK      | 0.60     | 0.25 | 2.36    | 0.39    |
| ATL – EAG***   | 1.53     | 0.25 | 6.08    | <0.0001 |
| ATL – GAL      | -0.31    | 0.25 | -1.22   | 0.98    |
| ATL – MIS      | 0.96     | 0.25 | 3.82    | 0.01    |
| ATL – NFARM*   | 0.30     | 0.23 | 1.27    | 0.97    |
| ATL – NORM     | -0.02    | 0.25 | -0.07   | 1.00    |
| ATL – PIG*     | 1.04     | 0.32 | 3.30    | 0.04    |
| ATL – RAM      | 0.82     | 0.25 | 3.25    | 0.05    |
| ATL – TKR***   | 1.25     | 0.25 | 4.96    | <0.0001 |
| BK – BRK       | -0.54    | 0.23 | -2.39   | 0.37    |
| BK – EAG       | 0.40     | 0.23 | 1.77    | 0.80    |
| BK – GAL***    | -1.44    | 0.23 | -6.40   | <0.0001 |
| BK – MIS       | -0.17    | 0.23 | -0.76   | 1.00    |
| BK – NFARM**   | -0.84    | 0.20 | -4.10   | 0.002   |
| BK – NORM*     | -1.15    | 0.23 | -5.12   | <0.0001 |
| BK – PIG       | -0.10    | 0.29 | -0.32   | 1.00    |
| BK – RAM       | -0.32    | 0.23 | -1.40   | 0.95    |
| BK – TKR       | 0.12     | 0.23 | 0.52    | 1.00    |
| BRK – EAG**    | 0.94     | 0.22 | 4.29    | 0.001   |
| BRK – GAL**    | -0.90    | 0.22 | -4.14   | 0.002   |
| BRK – MIS      | 0.37     | 0.22 | 1.68    | 0.85    |
| BRK – NFARM    | -0.30    | 0.20 | -1.52   | 0.91    |
| BRK – NORM     | -0.62    | 0.22 | -2.82   | 0.15    |
| BRK – PIG      | 0.44     | 0.29 | 1.53    | 0.91    |
| BRK – RAM      | 0.22     | 0.22 | 1.02    | 1.00    |
| BRK – TKR      | 0.65     | 0.22 | 3.00    | 0.09    |
| EAG – GAL***   | -1.84    | 0.22 | -8.42   | <0.0001 |
| EAG – MIS      | -0.57    | 0.22 | -2.61   | 0.24    |
| EAG – NFARM*** | -1.24    | 0.20 | -6.28   | <0.0001 |
| EAG – NORM***  | -1.55    | 0.22 | -7.10   | <0.0001 |
| EAG – PIG      | -0.49    | 0.29 | -1.71   | 0.83    |
| EAG – RAM*     | -0.71    | 0.22 | -3.27   | 0.04    |
| EAG – TKR      | -0.28    | 0.22 | -1.29   | 0.97    |
| GAL – MIS***   | 1.27     | 0.22 | 5.82    | <0.0001 |
| GAL – NFARM    | 0.60     | 0.20 | 3.07    | 0.08    |
| GAL – NORM     | 0.29     | 0.22 | 1.32    | 0.97    |
| GAL – PIG**    | 1.35     | 0.29 | 4.66    | 0.0002  |
| GAL – RAM***   | 1.13     | 0.22 | 5.15    | <0.0001 |
| GAL – TKR***   | 1.56     | 0.22 | 7.14    | <0.0001 |
| MIS – NFARM*   | -0.67    | 0.20 | -3.38   | 0.03    |
| MIS – NORM**   | -0.98    | 0.22 | -4.49   | 0.0004  |
| MIS – PIG      | 0.08     | 0.29 | 0.26    | 1.00    |
| MIS – RAM      | -0.14    | 0.22 | -0.66   | 1.00    |
| MIS – TKR      | 0.29     | 0.22 | 1.32    | 0.97    |
| NFARM – NORM   | -0.32    | 0.20 | -1.60   | 0.88    |
| NFARM – PIG    | 0.74     | 0.27 | 2.72    | 0.19    |
| NFARM – RAM    | 0.52     | 0.20 | 2.65    | 0.22    |
| NFARM – TKR*** | 0.95     | 0.20 | 4.85    | 0.0001  |
| NORM – PIG**   | 1.06     | 0.29 | 3.66    | 0.006   |
| NORM – RAM**   | 0.84     | 0.22 | 3.83    | 0.006   |
| NORM – TKR***  | 1.27     | 0.22 | 5.82    | <0.0001 |
| PIG – RAM      | -0.22    | 0.29 | -0.76   | 1.00    |
| PIG – TKR      | 0.21     | 0.29 | 0.73    | 1.00    |
| RAM – TKR      | 0.43     | 0.22 | 1.98    | 0.66    |

**Table S12.** Pearson's correlation p-values for each possible metal and phosphorous correlation.

| P       | AsT     | As      | Cd      | Pb      | Hg | Fe | Co | Cr | Cu | Mo | Mn | Ni | Se | Ti | V | Zn |
|---------|---------|---------|---------|---------|----|----|----|----|----|----|----|----|----|----|---|----|
| <0.0001 | 0.15    | <0.0001 | 0.014   |         |    |    |    |    |    |    |    |    |    |    |   |    |
| 0.62    | 0.66    | <0.0001 | 0.37    |         |    |    |    |    |    |    |    |    |    |    |   |    |
| <0.0001 | 0.80    | <0.0001 | 0.45    |         |    |    |    |    |    |    |    |    |    |    |   |    |
| 0.99    | 0.05    | <0.0001 | 0.01    | 0.03    |    |    |    |    |    |    |    |    |    |    |   |    |
| 0.11    | 0.32    | <0.0001 | 0.05    | <0.0001 |    |    |    |    |    |    |    |    |    |    |   |    |
| 0.39    | 0.06    | <0.0001 | 0.01    | <0.0001 |    |    |    |    |    |    |    |    |    |    |   |    |
| 0.76    | 0.24    | 0.003   | 0.10    | <0.0001 |    |    |    |    |    |    |    |    |    |    |   |    |
| 0.25    | 0.88    | <0.0001 | 0.89    | <0.0001 |    |    |    |    |    |    |    |    |    |    |   |    |
| 0.57    | 0.12    | <0.0001 | 0.54    | 0.007   |    |    |    |    |    |    |    |    |    |    |   |    |
| 0.003   | 0.01    | <0.0001 | 0.004   | 0.0001  |    |    |    |    |    |    |    |    |    |    |   |    |
| 0.71    | 0.002   | 0.06    | 0.001   | 0.35    |    |    |    |    |    |    |    |    |    |    |   |    |
| 0.70    | 0.05    | <0.0001 | 0.04    | 0.0004  |    |    |    |    |    |    |    |    |    |    |   |    |
| <0.0001 | <0.0001 | <0.0001 | <0.0001 | <0.0001 |    |    |    |    |    |    |    |    |    |    |   |    |
| 0.80    | 0.22    | 0.02    | 0.13    | <0.0001 |    |    |    |    |    |    |    |    |    |    |   |    |
